# Supplementary material
Source: publisher figshare collection journal article supplement (https://gsajournals.figshare.com/ndownloader/files/13991183)
Supplement: Supplementary file 1 [file 13991183]

## Sheet: TableS16
Table S16 Comparison of the gene sets of M. baccata with those of other Rosaceae plant
	Mb	Md	Pb	Pp	Fv
Number of genes	46114	46534	42269	27792	34301
Average gene length (bp)	2666.94	3754.31	2616.6	2447.31	2824.55
Average CDS length (bp)	1072.67	1208.48	1173.28	1214.84	1174.73
Average exon per gene	4.4	4.88	4.77	4.91	5.05
Average exon length (bp)	244.05	247.49	246.23	247.31	232.51
Average intron length (bp)	372.39	527.52	383.35	315.03	407.11
Mb, Malus baccata; Md, Malus domestica; Pb, Pyrus bretschneideri; Pp, Prunus persica; Fv, Fragaria vesca
